# Supplementary material for: Genome-wide prediction and analysis of human chromatin boundary elements
Source: PubMed Central journal article supplement — Nucleic Acids Res. 2011 Sep 19;40(2):511–29. doi: 10.1093/nar/gkr750 (PMC3258141; doi:10.1093/nar/gkr750), 2011-09-19
Supplement: supp_gkr750_nar-01304-n-2011-File018.pdf [file supp_gkr750_nar-01304-n-2011-File018.pdf]

**Supplementary Figure 1: Example of predicted chromatin domains.** An ideogram of chromosome 2 shows the cytogenetic banding pattern along with the location of this specific example. The distributions of ChIP-seq tag mapping peaks for the active histone modification (red bars), the repressive histone modification (blue bars) are shown in separate tracks. The predicted euchromatic domains (red bands) and heterochromatic domains (blue bands) are shown in the tracks denoted as 'Euchromatin' and 'Heterochromatin'.

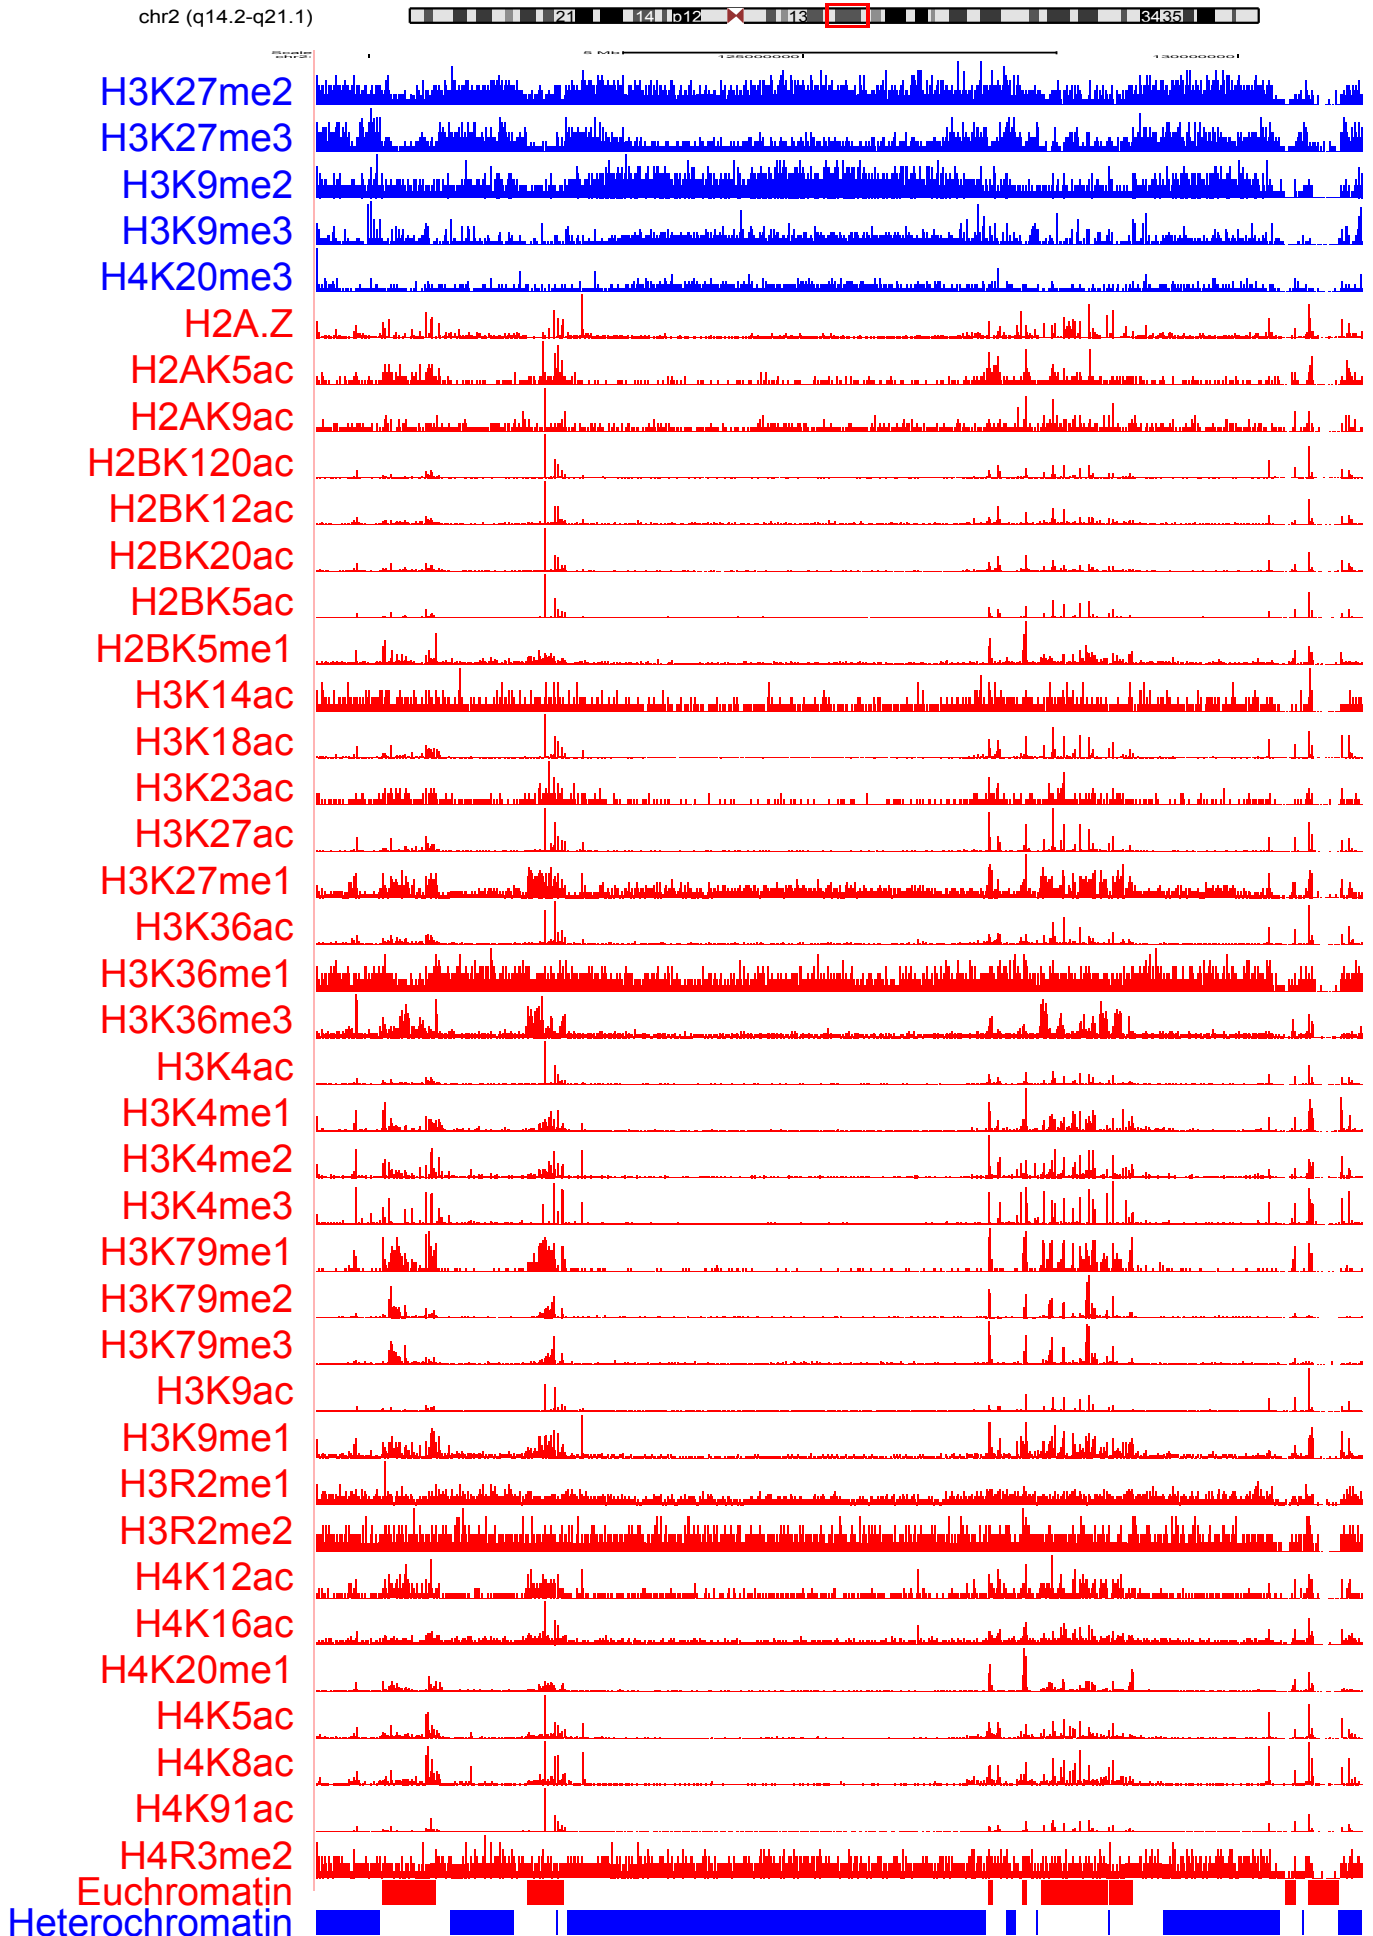

**Supplementary Figure 2: Examples of predicted boundary elements with CTCF binding.** The predicted boundary elements are shown as green bands. ChIP-seq peaks for active and repressive histone modifications, along with the locations of euchromatic domains and heterochromatic domains are illustrated as separate tracks (as in Supplementary Figure 1)

chr1 (q42.12)  p31.1 1q12 q41 4344

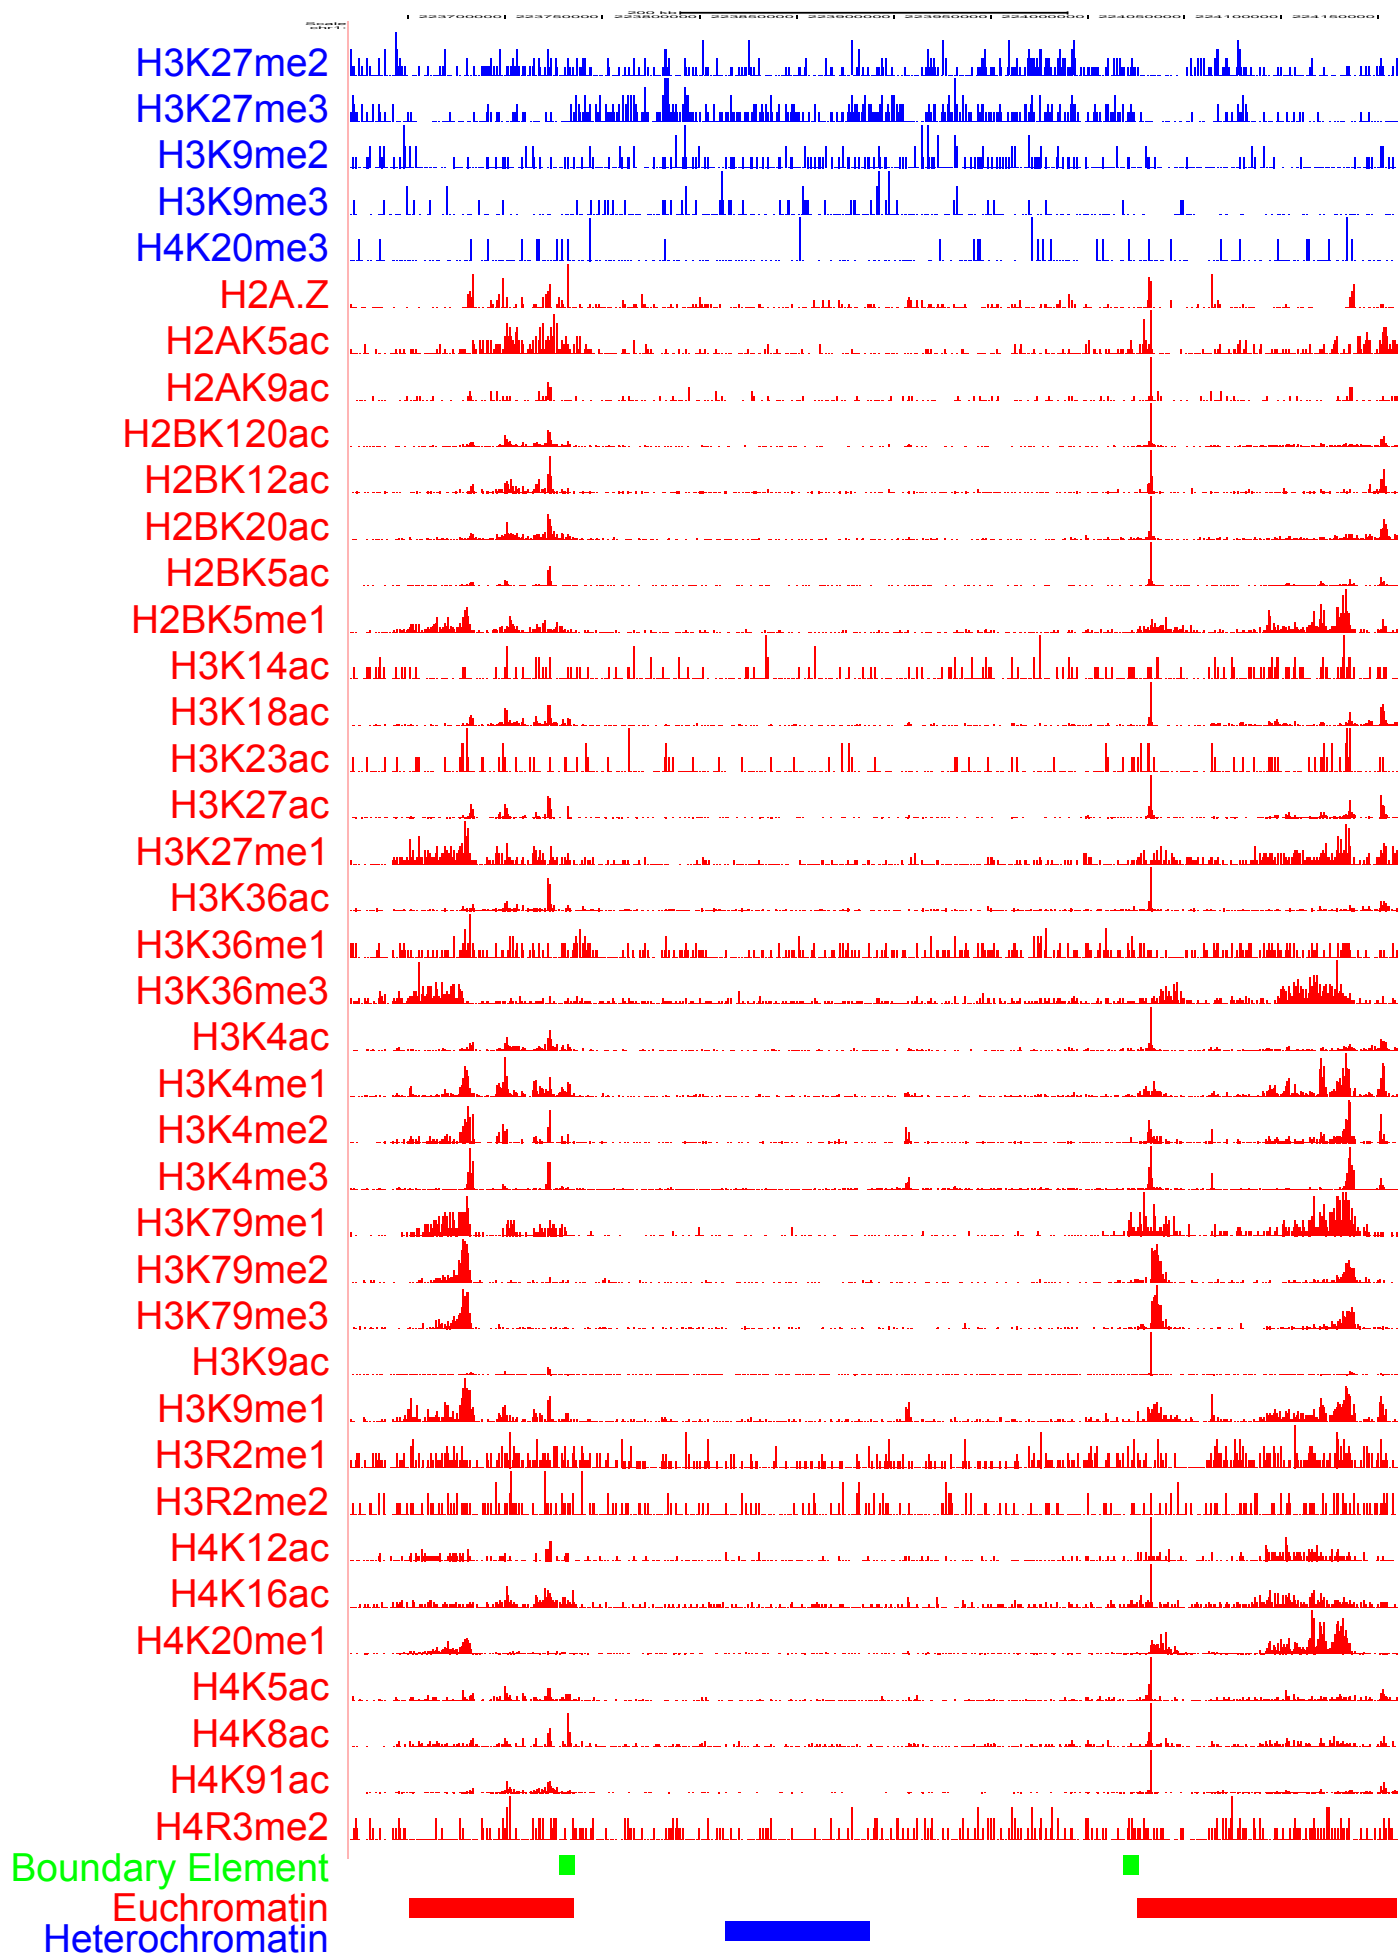

**Supplementary Figure 3: Example of a predicted boundary element without CTCF binding.** The predicted boundary element is shown as green bands. ChIP-seq peaks for active and repressive histone modifications, along with the locations of euchromatic domains and heterochromatic domains are illustrated as separate tracks (as in Supplementary Figure 1)

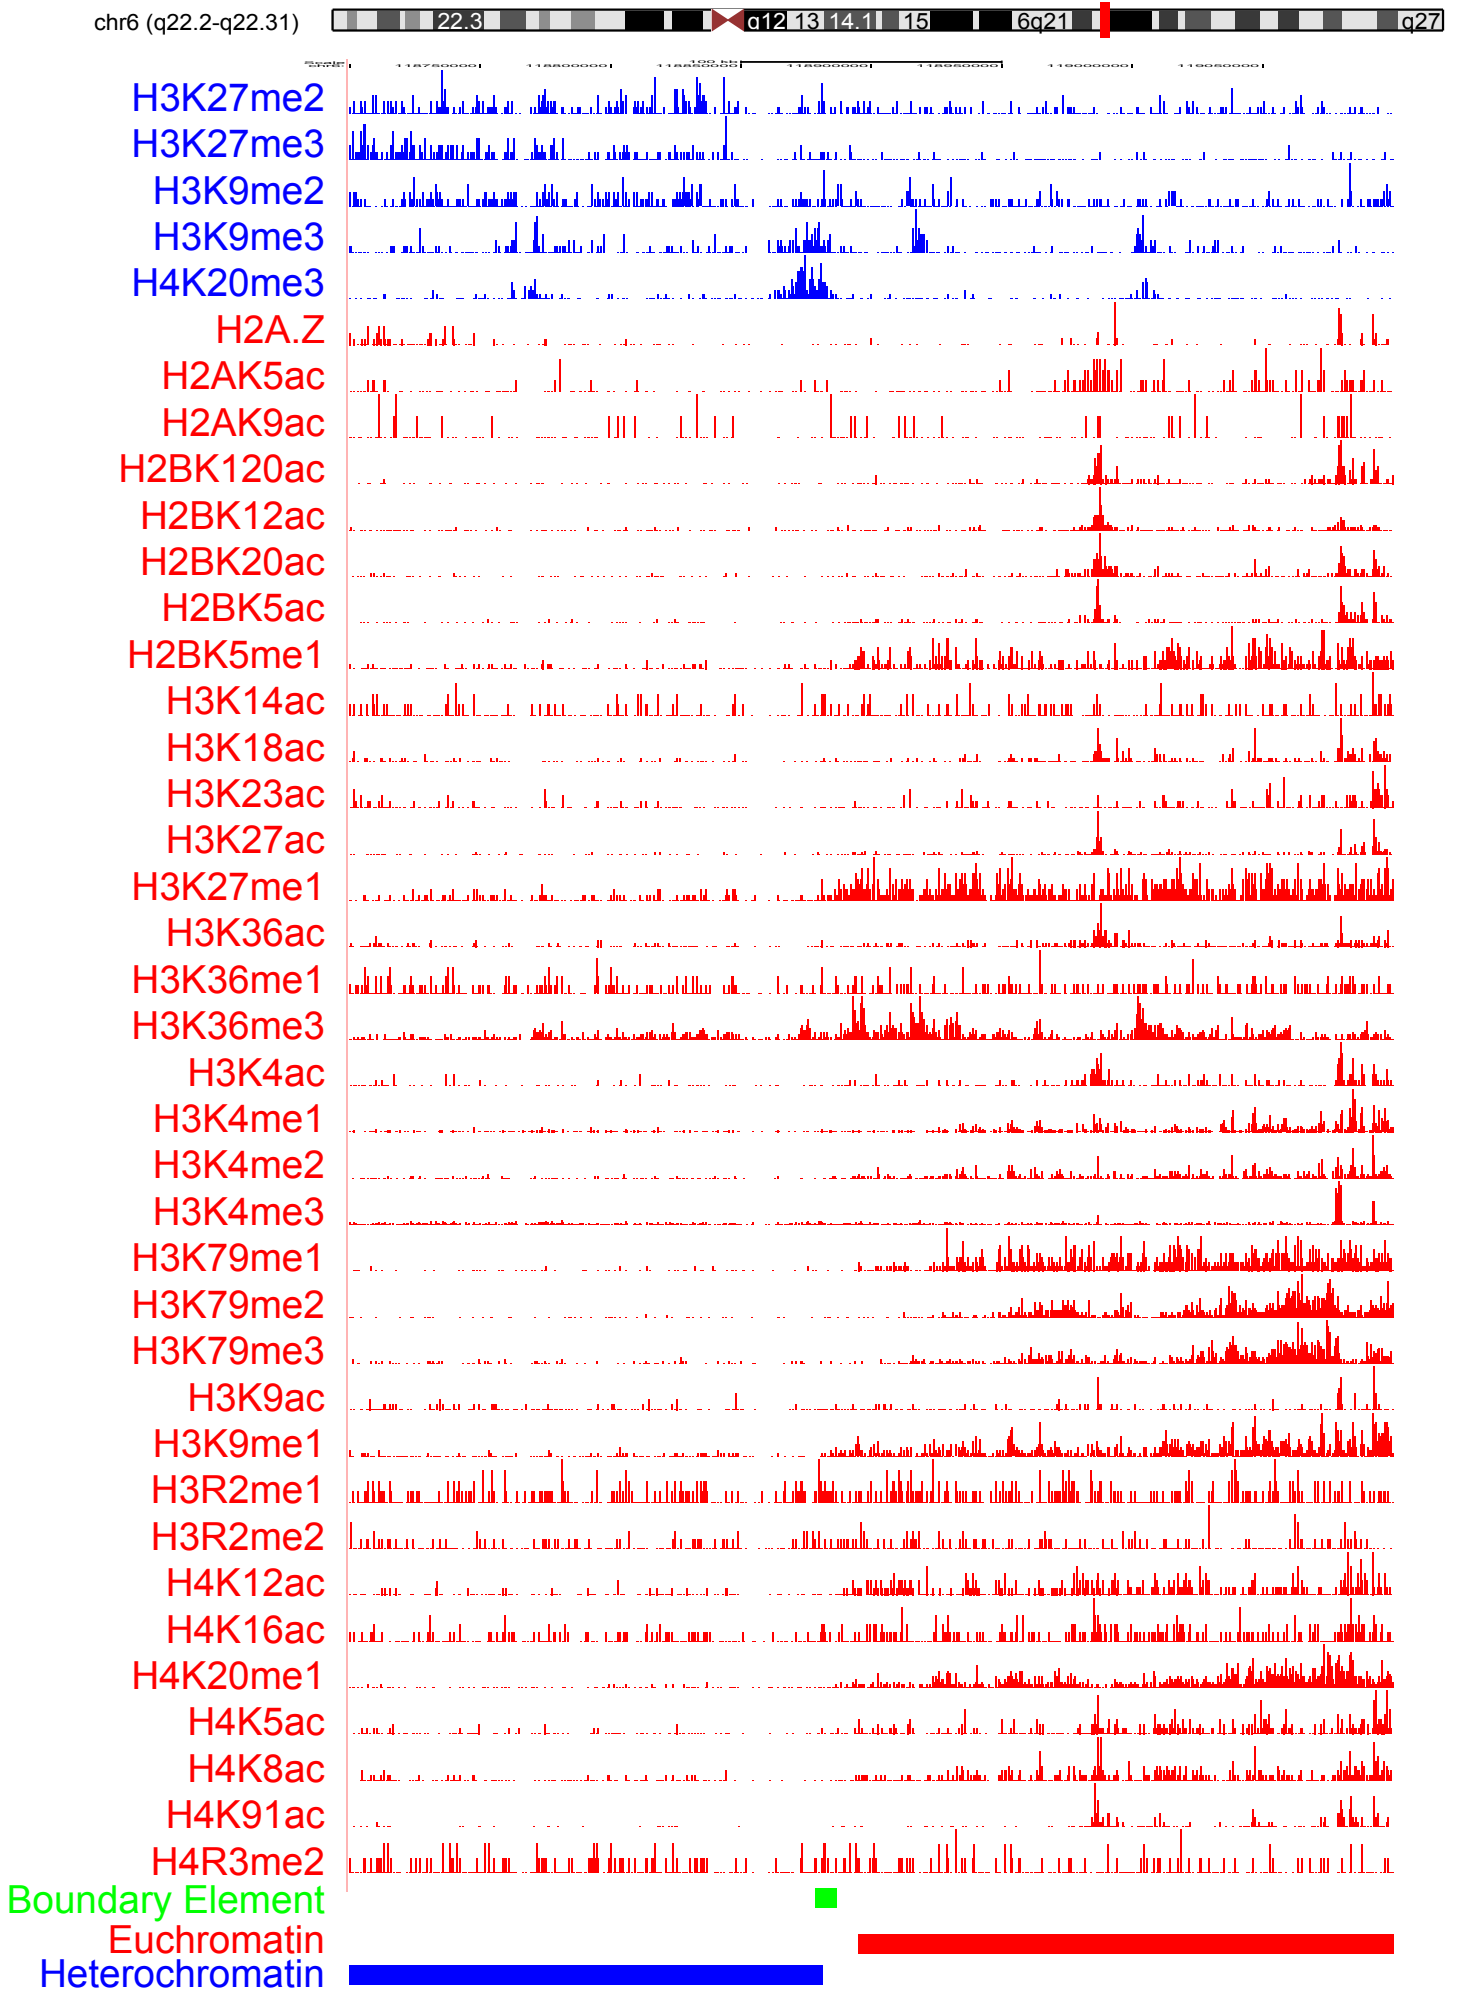

**Supplementary Figure 4: The predicted boundary element overlapping with BEAD-1.** The predicted boundary element is shown as the green band. ChIP-seq peaks for active and repressive histone modifications, along with the locations of euchromatic domains and heterochromatic domains are illustrated as separate tracks (as in Supplementary Figure 1)

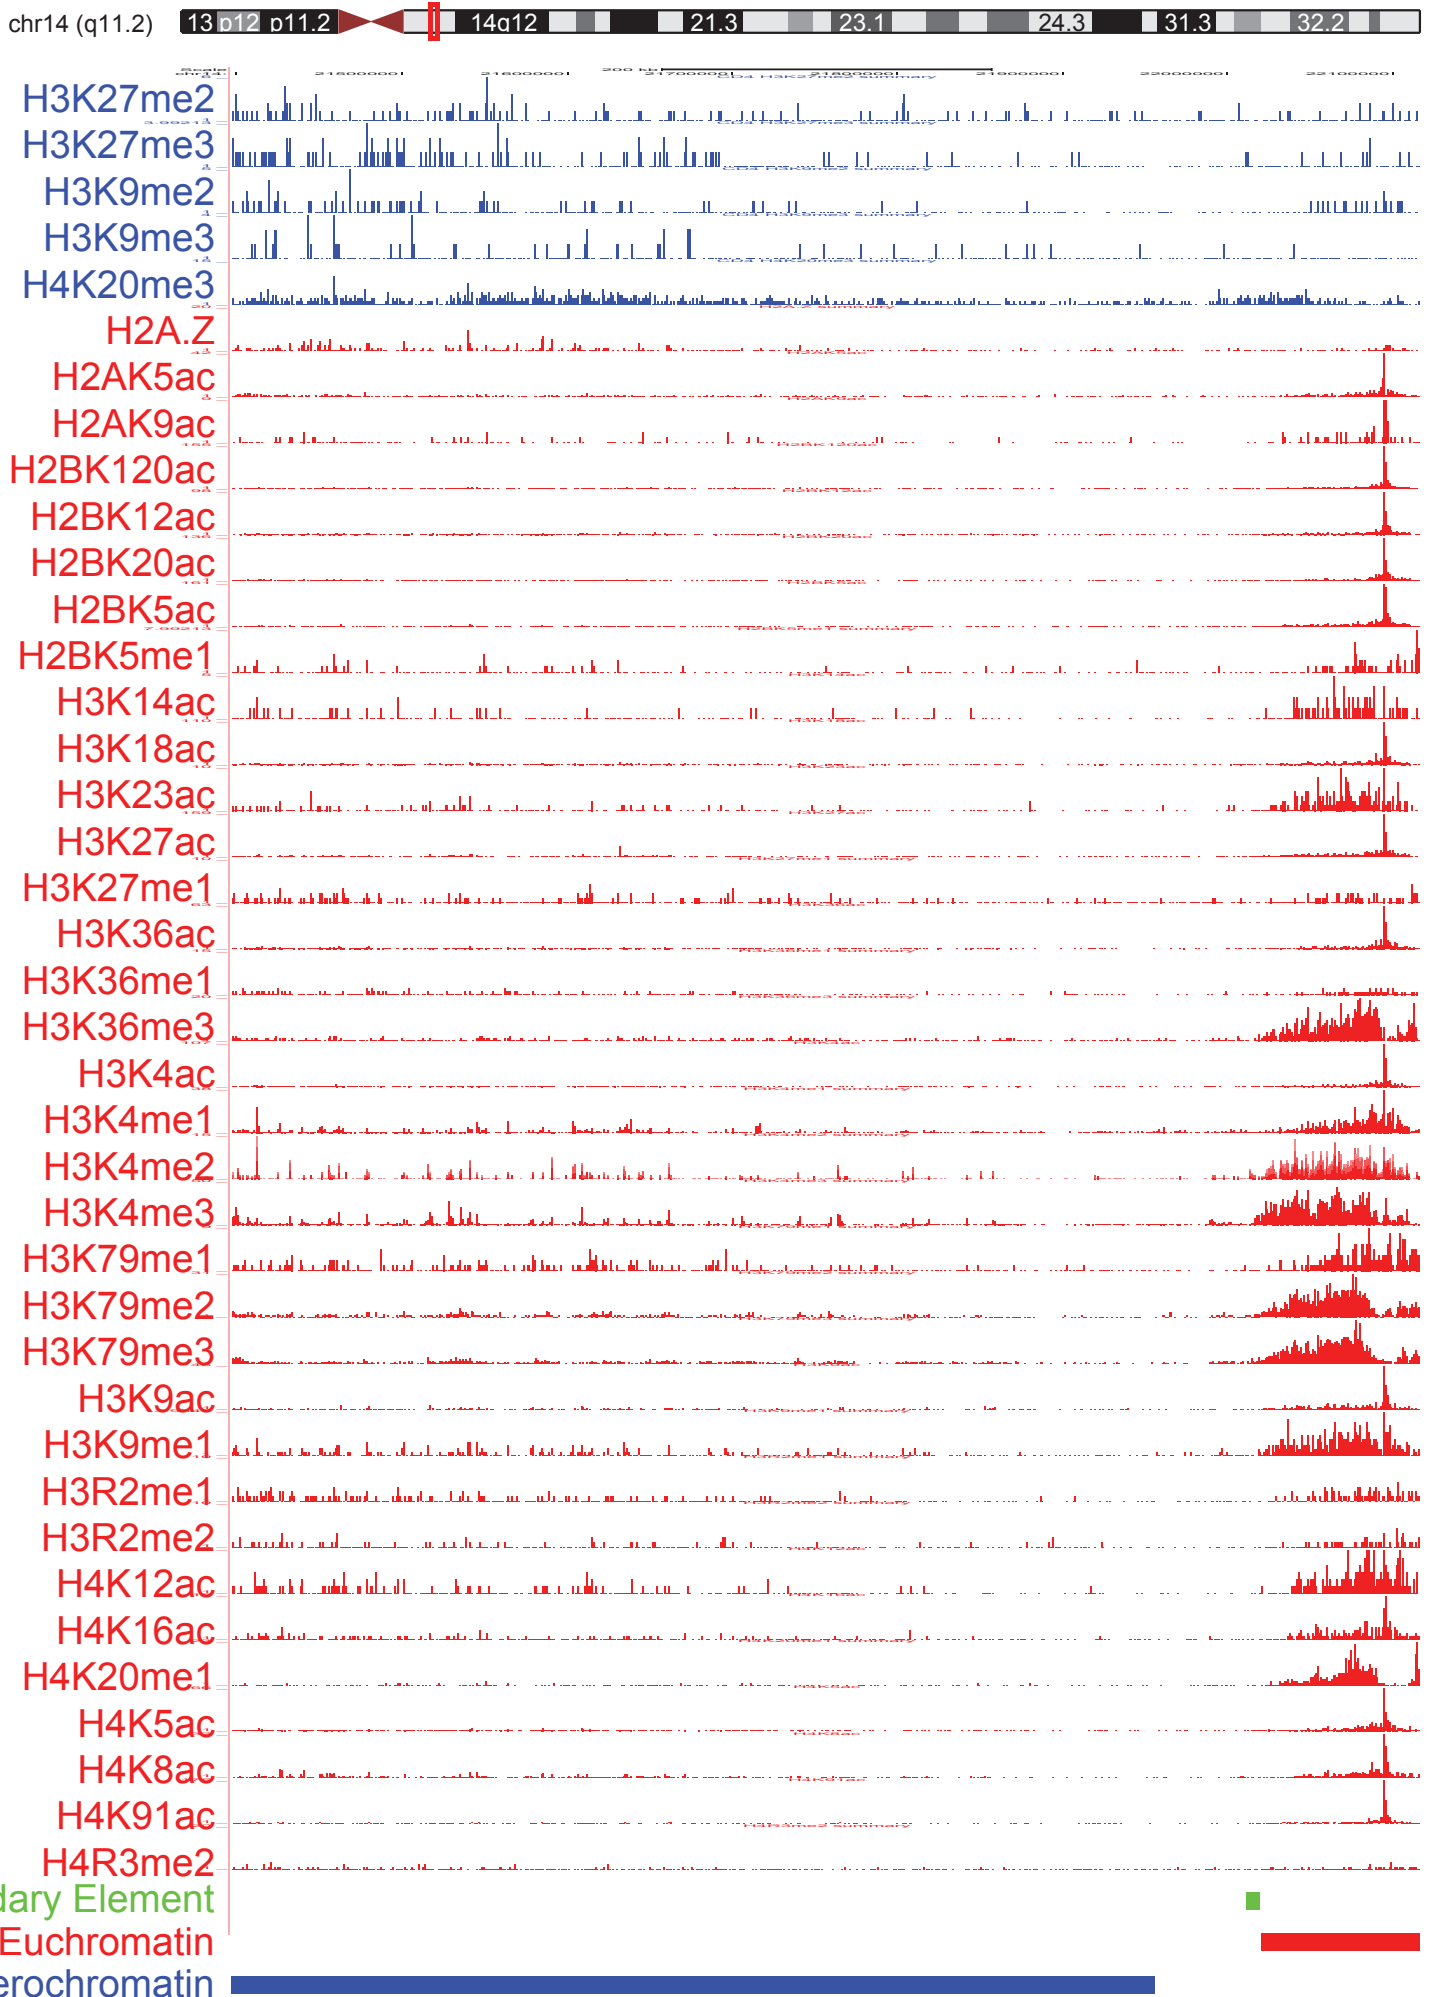

**Supplementary Figure 5: Overlaps between conserved TFBSs.** **A.** Heatmap showing the degrees of pairwise overlaps between TFBSs; **B.** Matrix showing the numbers of pairwise overlaps between TFBSs; **C.** List of numbers of all observed combinations of TFBSs.

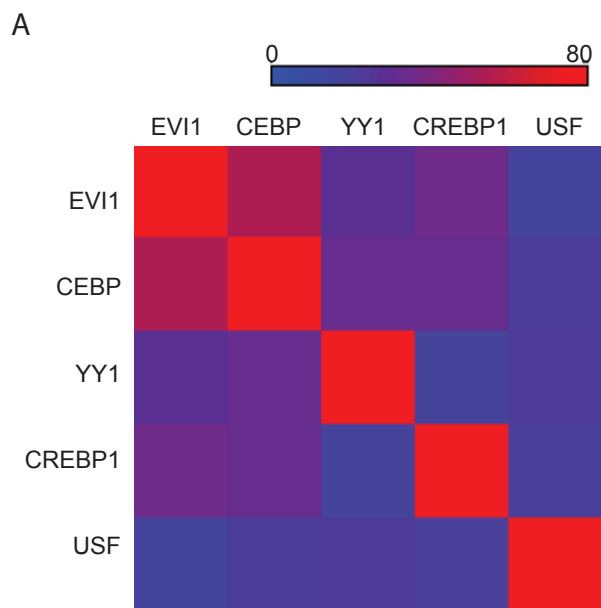

**B**

| Pairwise Comparisons | EVI1 | CEBP | YY1 | CREBP1 | USF |
|----------------------|------|------|-----|--------|-----|
| EVI1                 | 382  | 54   | 28  | 35     | 17  |
| CEBP                 | 54   | 249  | 33  | 33     | 22  |
| YY1                  | 28   | 33   | 157 | 18     | 23  |
| CREBP1               | 35   | 33   | 18  | 150    | 20  |
| USF                  | 17   | 22   | 23  | 20     | 140 |

**C**

| Combination             | Number |
|-------------------------|--------|
| EVI1 only               | 214    |
| CEBP only               | 120    |
| CEBP, EVI1              | 35     |
| YY1 only                | 80     |
| YY1, EVI1               | 13     |
| YY1, CEBP               | 16     |
| YY1, CEBP, EVI1         | 8      |
| CREBP1 only             | 57     |
| CREBP1, EVI1            | 23     |
| CREBP1, CEBP            | 17     |
| CREBP1, CEBP, EVI1      | 6      |
| CREBP1, YY1             | 7      |
| CREBP1, YY1, EVI1       | 1      |
| CREBP1, YY1, CEBP       | 3      |
| CREBP1, YY1, CEBP, EVI1 | 2      |
| USF only                | 70     |
| USF, EVI1               | 9      |
| USF, CEBP               | 13     |
| USF, CEBP, EVI1         | 1      |
| USF, YY1                | 12     |
| USF, YY1, EVI1          | 3      |
| USF, YY1, CEBP          | 2      |
| USF, YY1, CEBP, EVI1    | 1      |
| USF, CREBP1             | 9      |
| USF, CREBP1, EVI1       | 2      |
| USF, CREBP1, CEBP       | 3      |
| USF, CREBP1, CEBP, EVI1 | 1      |
| USF, CREBP1, YY1        | 4      |
| USF, CREBP1, YY1, CEBP  | 1      |

**Supplementary Figure 6: Enrichment profiles around boundary elements of histone modifications which show distinct peaks.** The average fold enrichments (y-axis) of individual histone modifications are plotted for the predicted boundary elements (8kb), the heterochromatin sides (8kb) and the euchromatin sides (8kb).

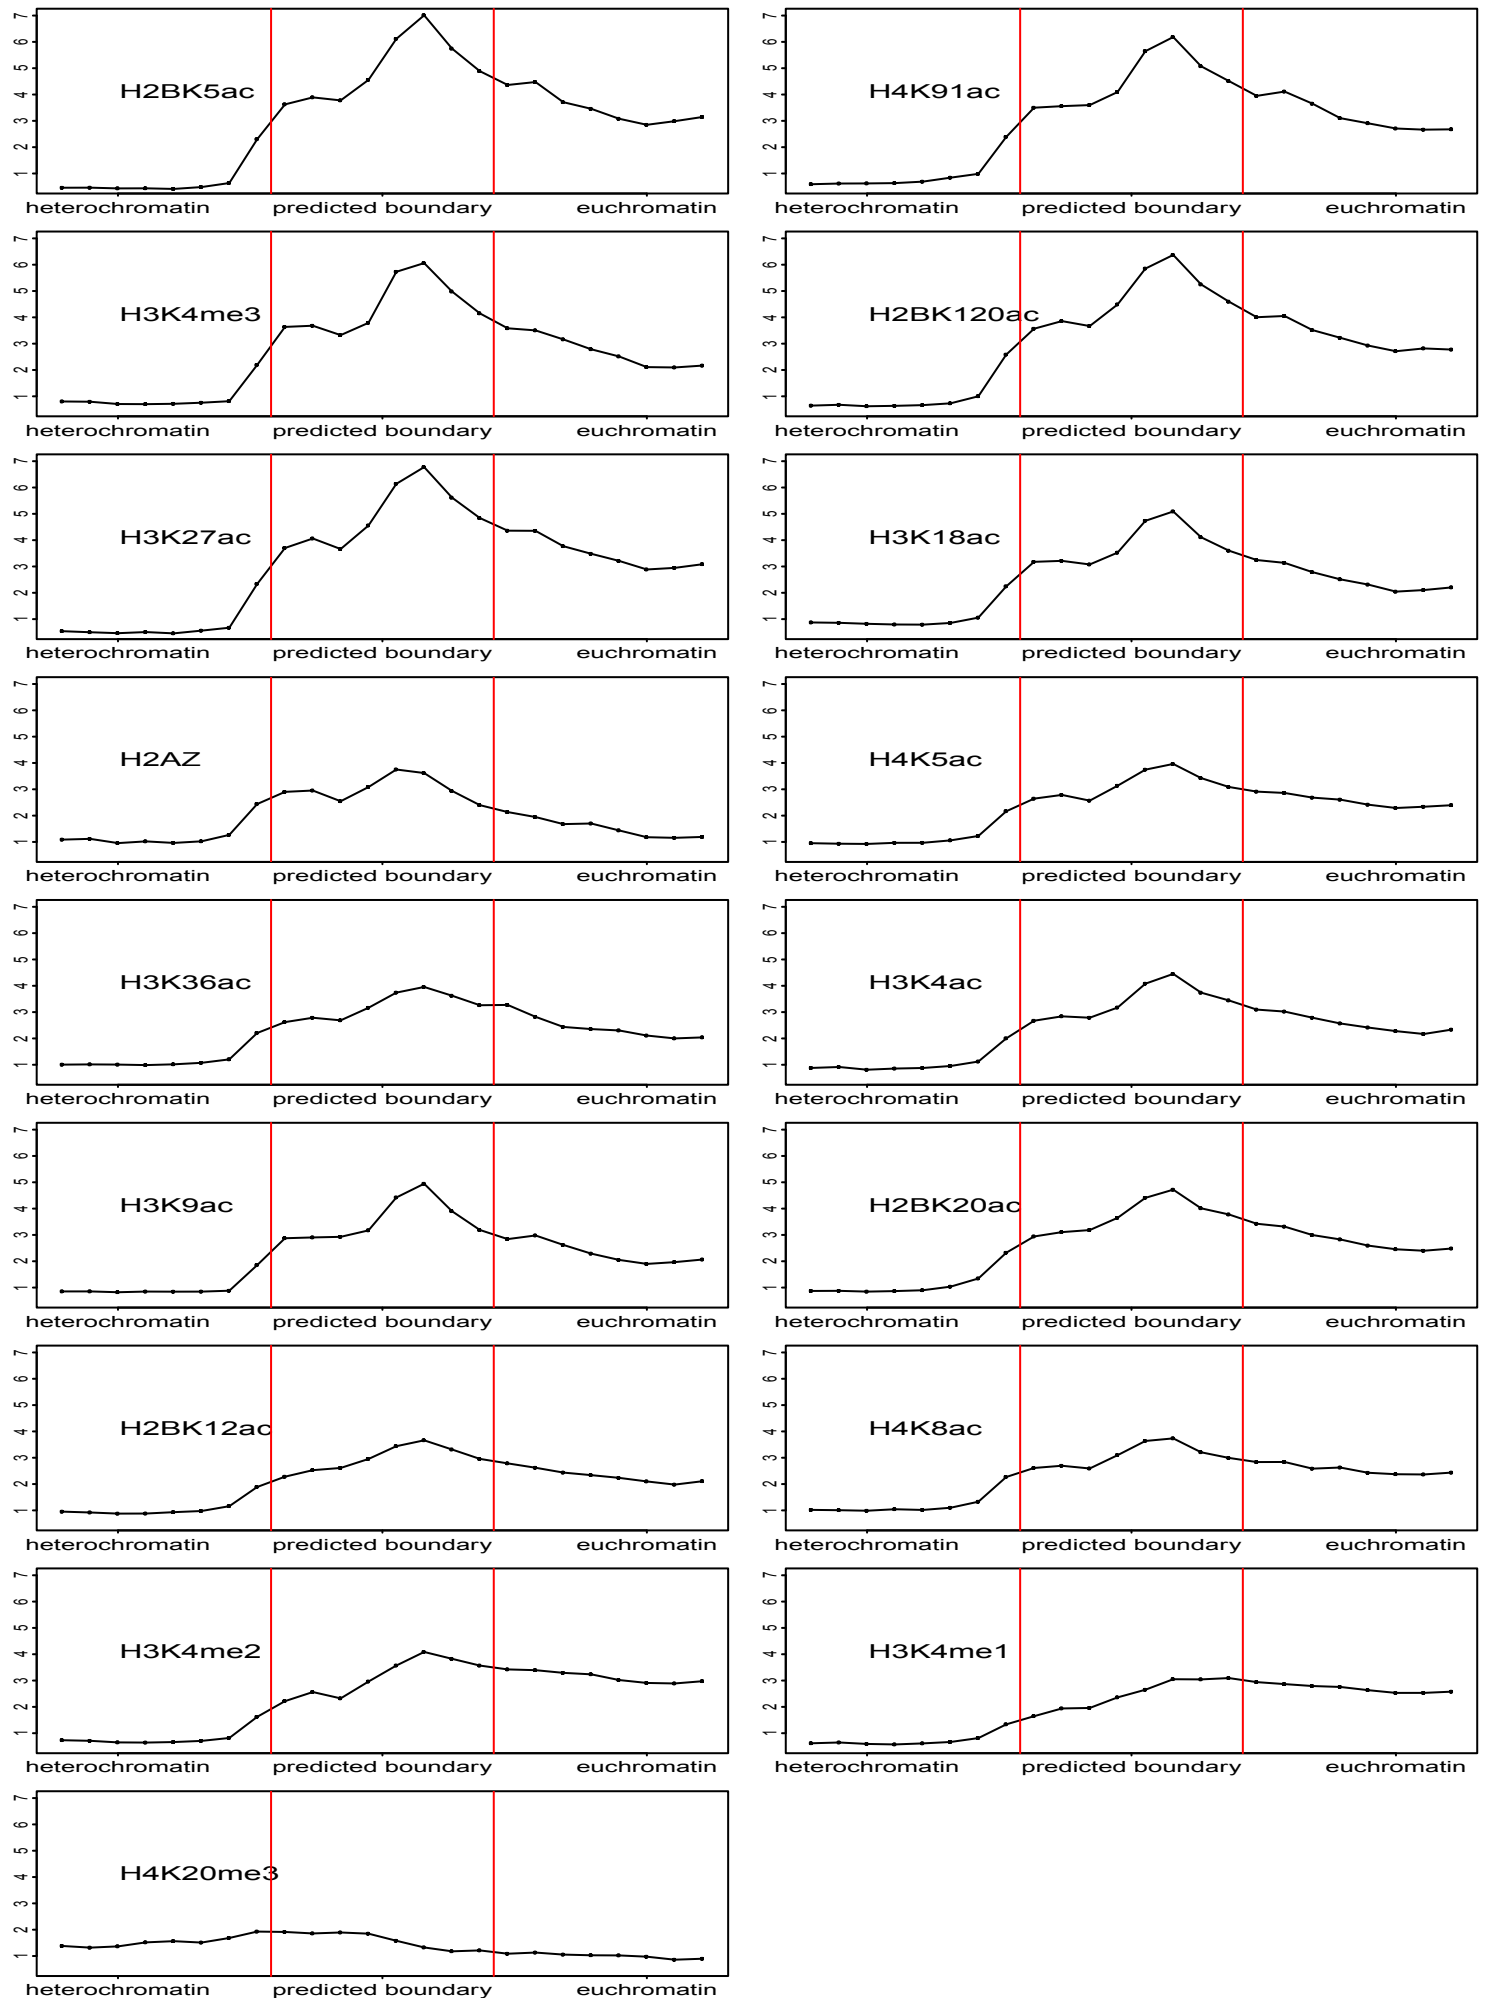

**Supplementary Figure 7: Enrichment profiles around boundary elements of histone modifications which increase from heterochromatin to euchromatin.** The average fold enrichments (y-axis) of individual histone modifications are plotted for the predicted boundary elements (8kb), the heterochromatin sides (8kb) and the euchromatin sides (8kb).

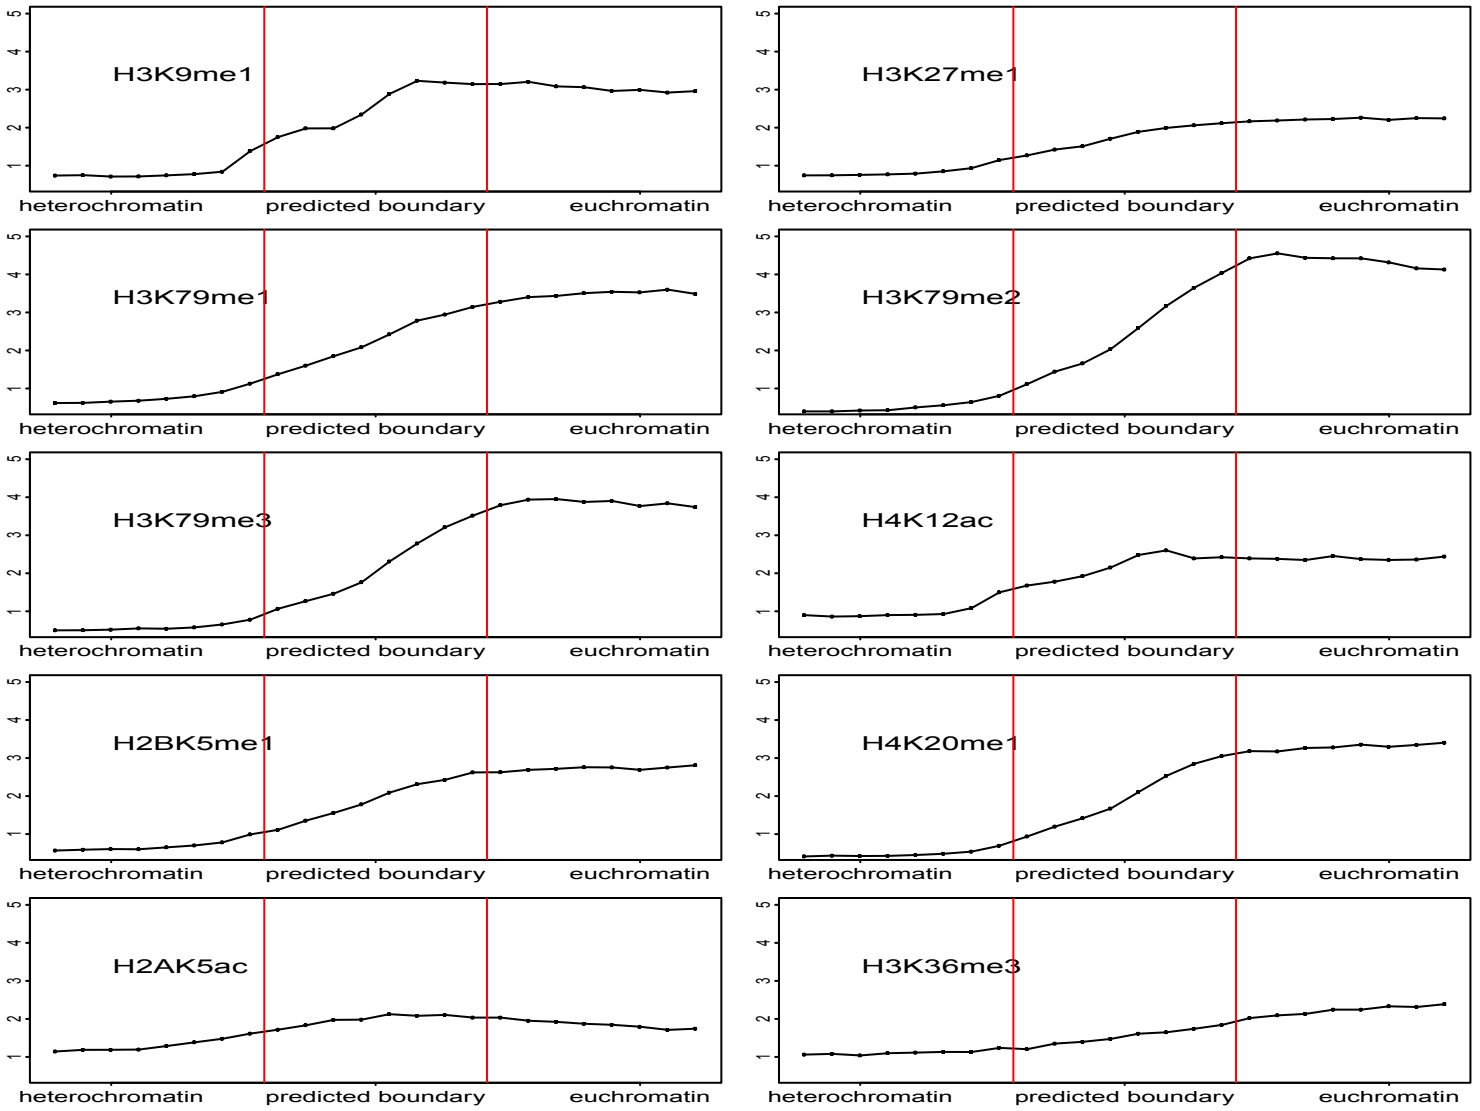

**Supplementary Figure 8: Enrichment profiles around boundary elements of histone modifications which decrease from heterochromatin to euchromatin.** The average fold enrichments (y-axis) of individual histone modifications are plotted for the predicted boundary elements (8kb), the heterochromatin sides (8kb) and the euchromatin sides (8kb).

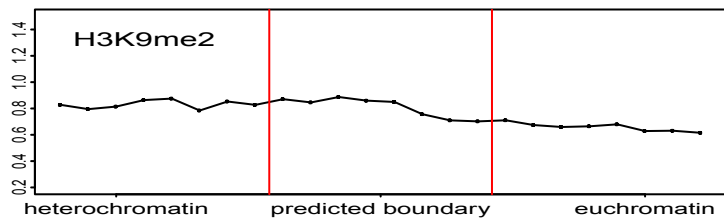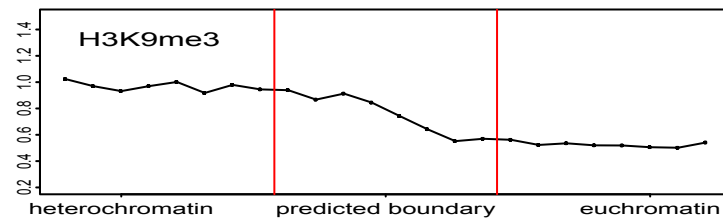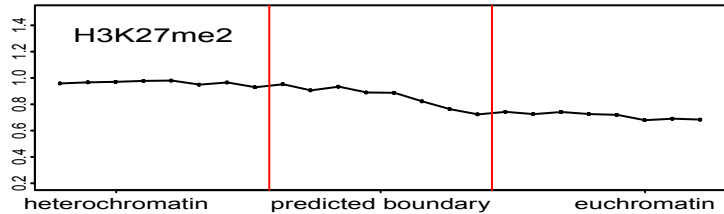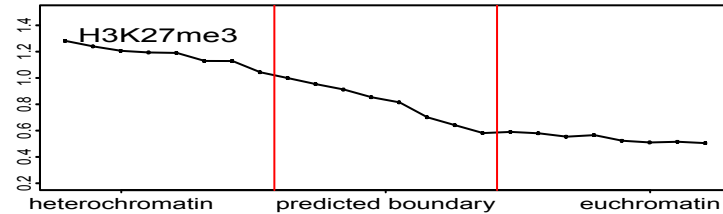



Supplementary Table 1: Sequence Features of RITs and Predicted Boundary Elements.

|                              | RIT     | Boundary Element |
|------------------------------|---------|------------------|
| Median Size                  | 68.6 kb | 8 kb             |
| GC content                   | 0.421   | 0.423            |
| CpG O/E <sup>1</sup>         | 0.229   | 0.316            |
| Genic Fractions <sup>2</sup> | 43.0%   | 40.9%            |

<sup>1</sup>The ratio of observed CpG frequency to expected CpG frequency.

<sup>2</sup>The length fractions of regions within gene bodies.

Supplementary Table 2: Enriched Gene Ontology and KEGG Terms of Genes in Predicted Euchromatin Domains with High Gene Densities (>1 gene/20kb)

|                  | Term                                        | P-value |
|------------------|---------------------------------------------|---------|
| Gene<br>Ontology | ATP dependent helicase activity             | 0.039   |
|                  | Defense Response                            | 0.045   |
|                  | Glycerophospholipid Biosynthetic Process    | 0.056   |
|                  | Regulation of Response to External Stimulus | 0.069   |
|                  | Inflammatory Response                       | 0.070   |
| KEGG<br>Pathway  | Systemic Lupus Erythematosus                | 0       |
|                  | Antigen Processing and Presentation         | 0.017   |
